# Supplementary material for: Epitopes of anti-RIFIN antibodies and characterization of rif-expressing Plasmodium falciparum parasites by RNA sequencing
Source: PubMed Central journal article supplement (PMC5324397; doi:10.1038/srep43190), 2017-02-24

## Epitopes of anti-RIFIN antibodies and characterization of *rif*-expressing *Plasmodium falciparum* parasites by RNA sequencing

Jun-Hong Ch'ng, Madle Sirel, Arash Zandian, Maria del Pilar Quintana, Sherwin Chun Leung Chan, Kirsten Moll, Asa Tellgren-Roth, IngMarie Nilsson, Peter Nilsson, Ulrika Qundos & Mats Wahlgren

### Supplementary Figure Legends

Supplementary Figure S1. Full length western blots of RIFINs in multiple parasite strains. SDS-extracted parasite lysates of (A) S1.2R, S1.2NR, FCR3CSA, NF54CSA, 3D7CD36ICAM1 and IT4CD36ICAM1 were run on SDS-PAGE (lanes 1-6 respectively), as well as SDS-extracted lysates of (B) PAvArO and R29 (lanes 1 and 2 respectively). Blots were transferred to nitrocellulose membrane and blotted with rabbit anti-PfHsp70 (1:2000), non-immune rabbit IgG (10 µg/ml), RαRIF<sub>C</sub> rabbit IgG (10 µg/ml), RαRIF<sub>I</sub> rabbit IgG (10 µg/ml), non-immune goat IgG (10 µg/ml) and GαRIF goat IgG (10 µg/ml). Corresponding HRP-conjugated secondary anti-rabbit and anti-goat IgG antibodies were used together with ECL reagent for detection. Description of the antigens used for immunizations of RαRIF<sub>C</sub>, RαRIF<sub>I</sub> and GαRIF are described in Supplementary Table S1.

Supplementary Figure S2. Epitope region mapping of anti-RIFIN antibodies with epitope regions highlighted. The reactivity for IgG purified from (A) RαRIF<sub>C</sub>, (B) RαRIF<sub>I</sub> and (C) GαRIF are shown here against peptides from the RIFIN protein PF3D7\_0100400 (left panels) and the corresponding epitope regions (right panels, black bars). Y-axis shows mean median fluorescence intensity of duplicate spots and X-axis shows the peptide number from the N terminus to the C-terminus. RαRIF<sub>C</sub> was immunized with the C-terminus, RαRIF<sub>I</sub> with the indel region and GαRIF with the full length PF3D7\_0100400 protein.

Supplementary Figure S3. Alignment of RIFIN amino acid sequences. Full length sequences of PF3D7\_0100400, PFIT\_bin05750 (dominant *rif* of S1.2R), PFIT\_0835500 (dominant *rif* of IT4CD36ICAM1) and PFIT\_bin00500 (dominant *rif* of FCR3CSA) were aligned by Clustal Omega and the three predicted transmembrane (TM) regions highlighted in pink. Amino acid sequences of PF3D7\_0100400 and PFIT\_bin05750 were used previously in Goel et al. (2015).

# Supplementary Figure S1

A.

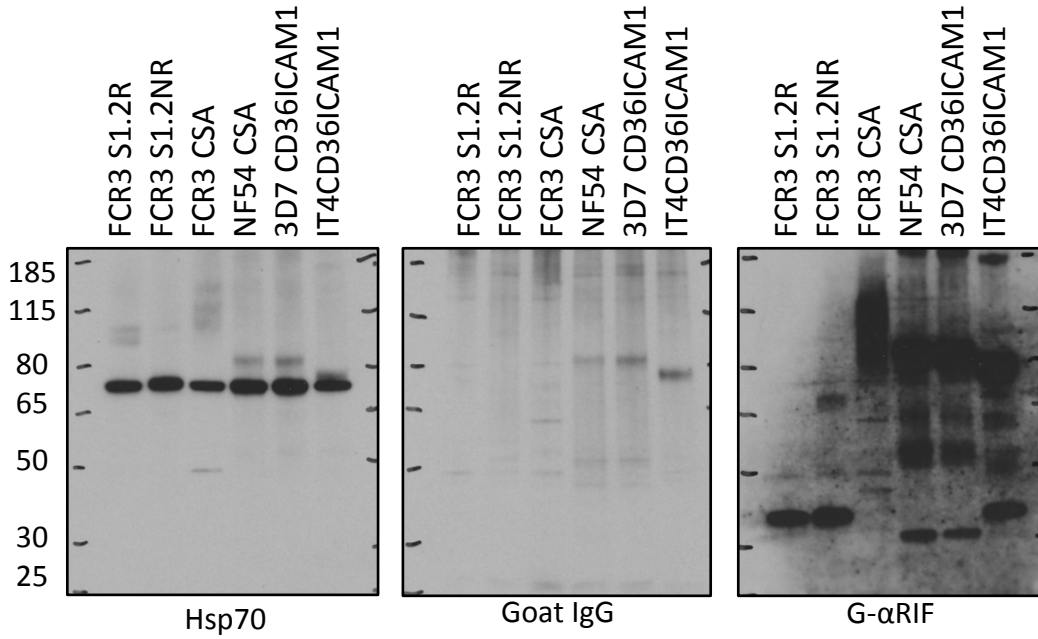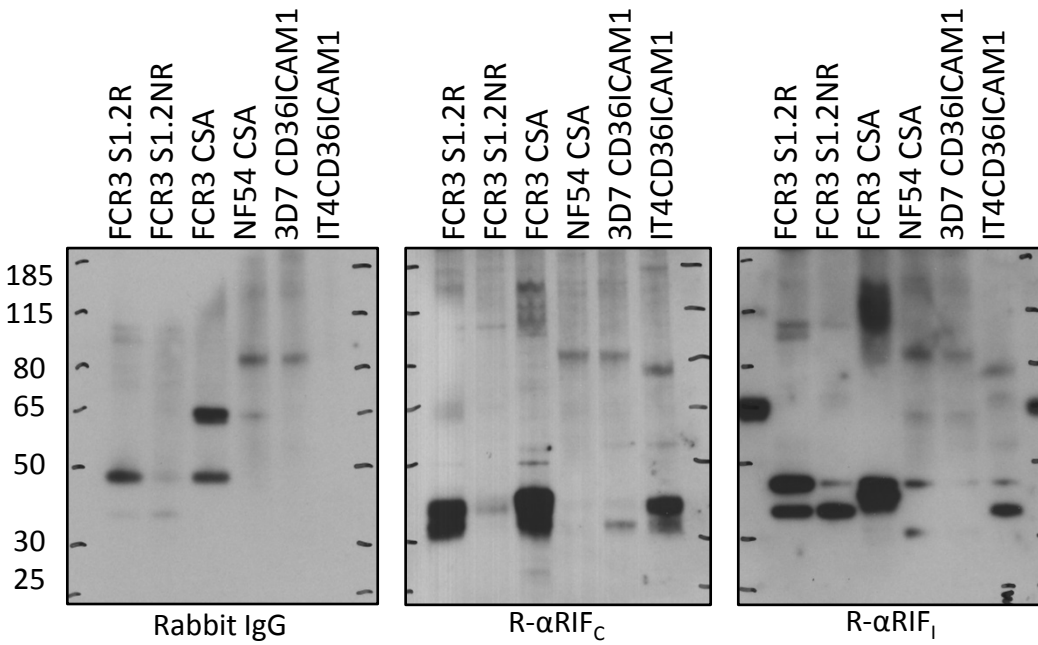

B.

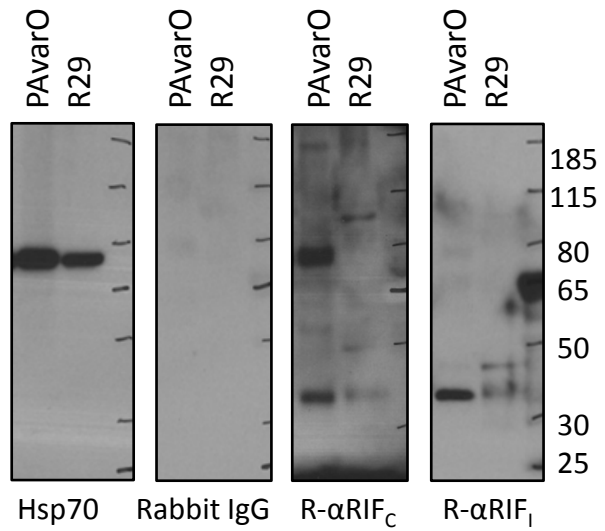

# Supplementary Figure S2

A.

R- $\alpha$ RIF<sub>C</sub>

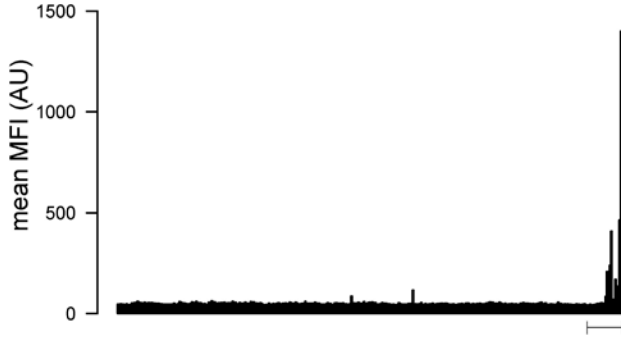

PF3D7\_0100400 peptides 1-361

R- $\alpha$ RIF<sub>C</sub> Epitopes

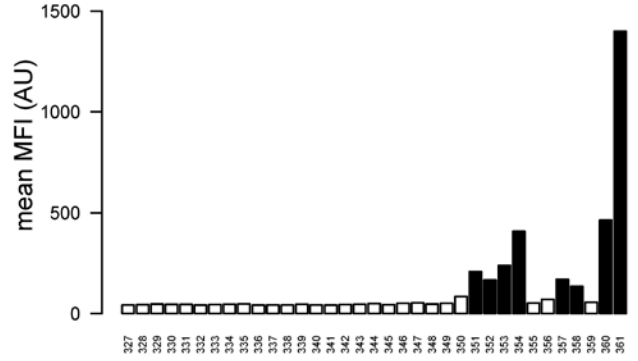

PF3D7\_0100400 peptide number

B.

R- $\alpha$ RIF<sub>I</sub>

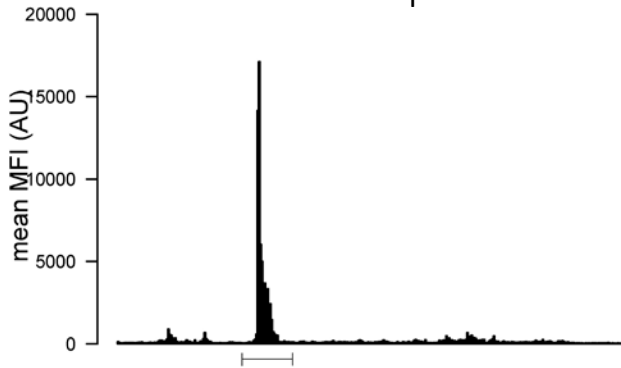

PF3D7\_0100400 peptides 1-361

R- $\alpha$ RIF<sub>I</sub> Epitope

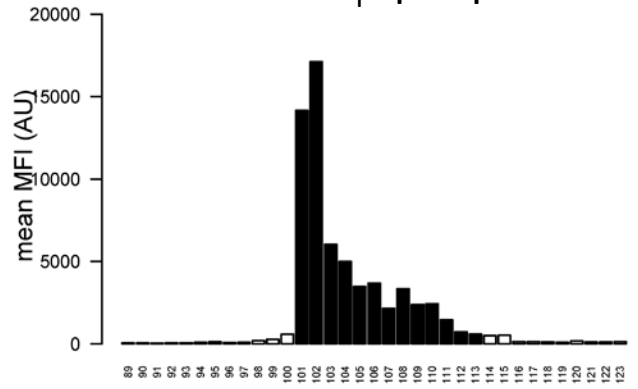

PF3D7\_0100400 peptide number

C.

G- $\alpha$ RIF

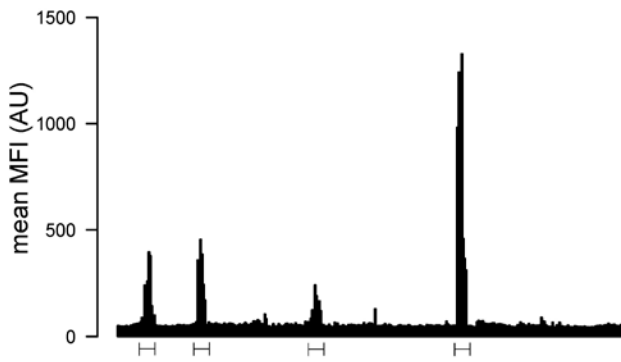

PF3D7\_0100400 peptides 1-361

G- $\alpha$ RIF Epitopes

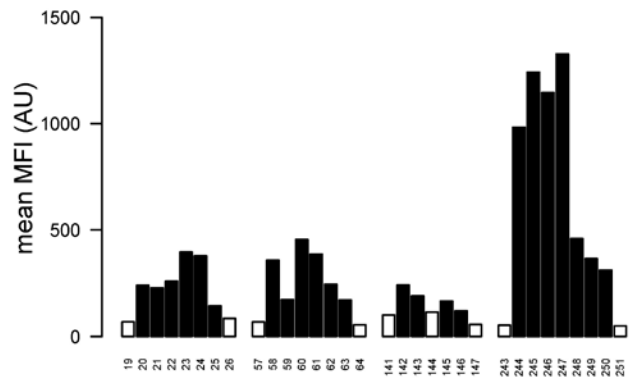

PF3D7\_0100400 peptide number

# Supplementary Figure S3

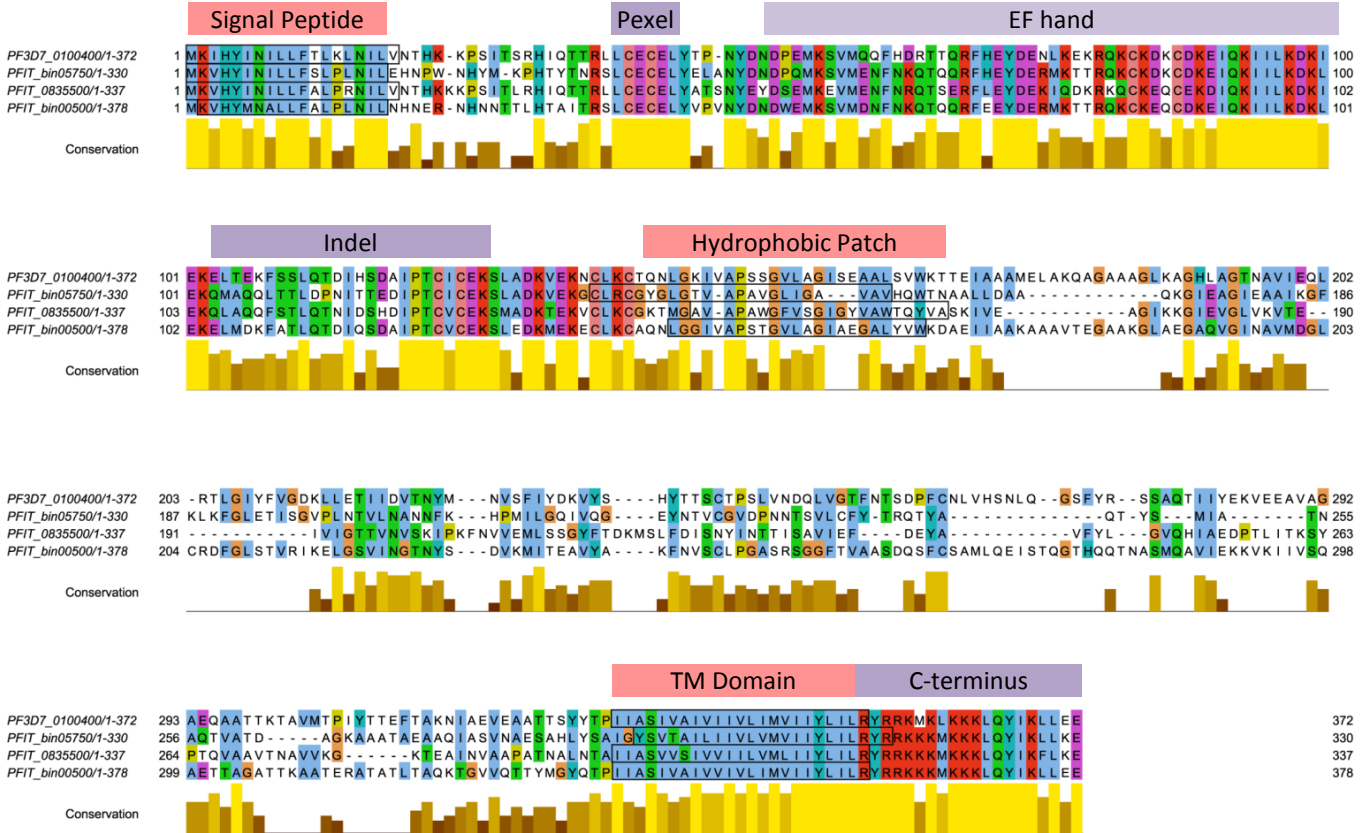

Supplement: srep43190-s1.pdf [file srep43190-s1.pdf]
